# Supplementary material
Source: PubMed Central journal article supplement (PMC6113492)
Supplement: zjm999096103s1.pdf [file zjm999096103s1.pdf]

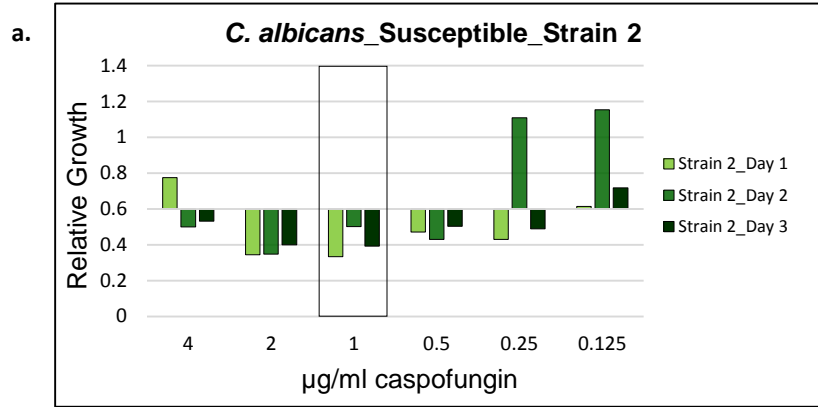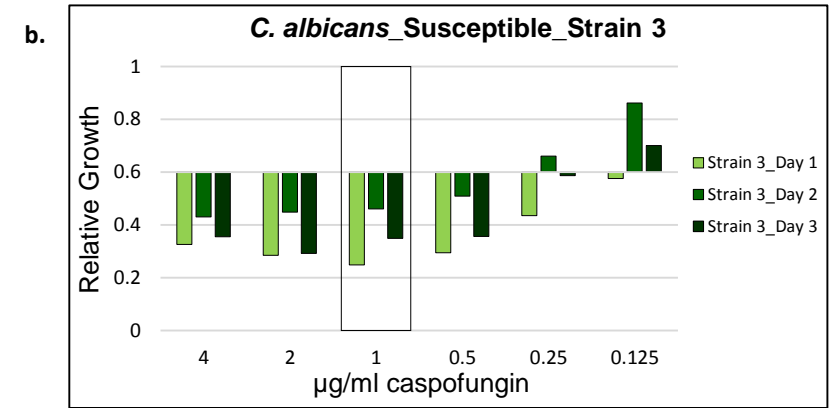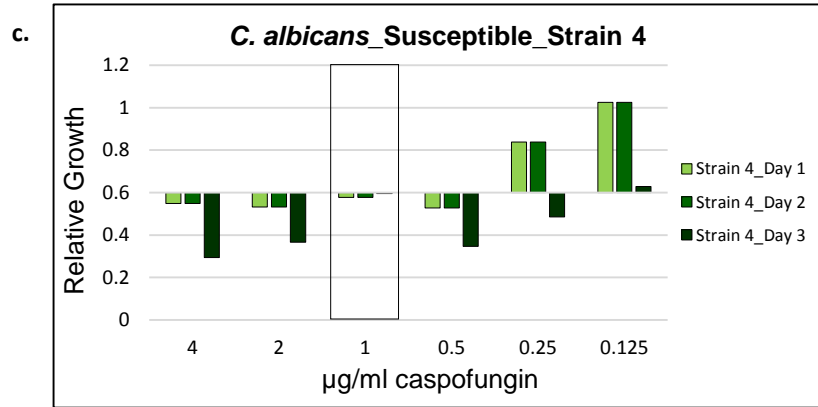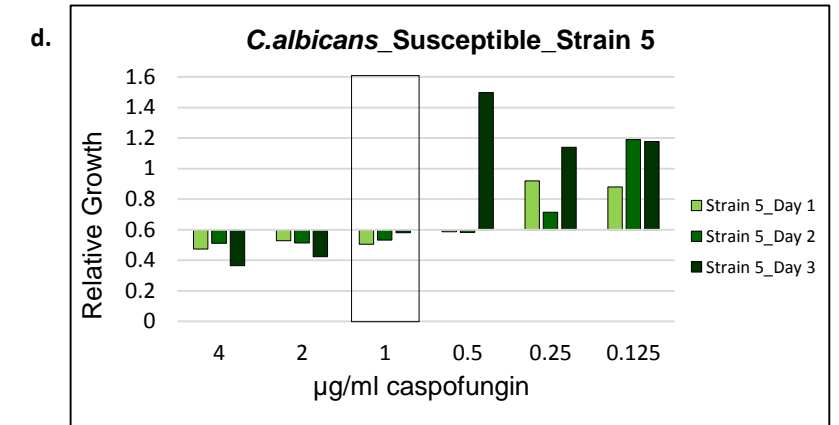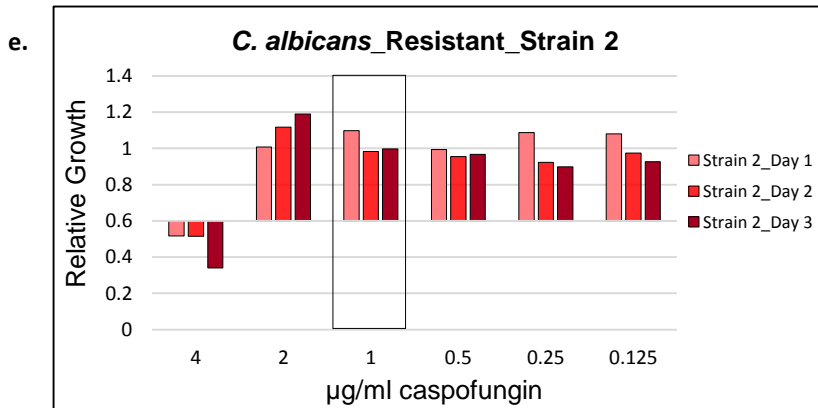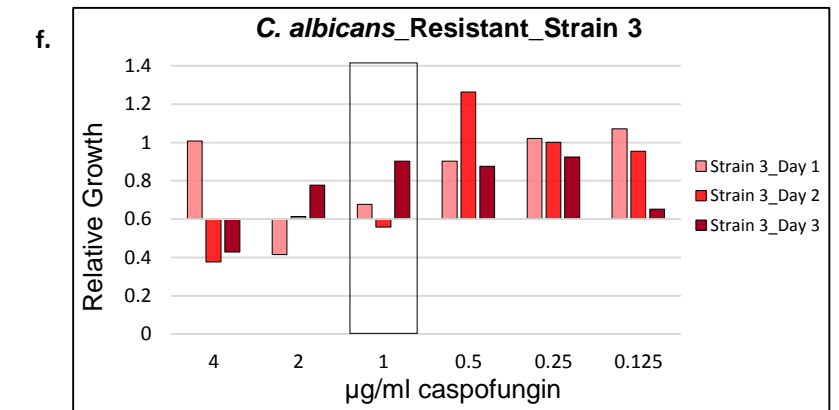

g.

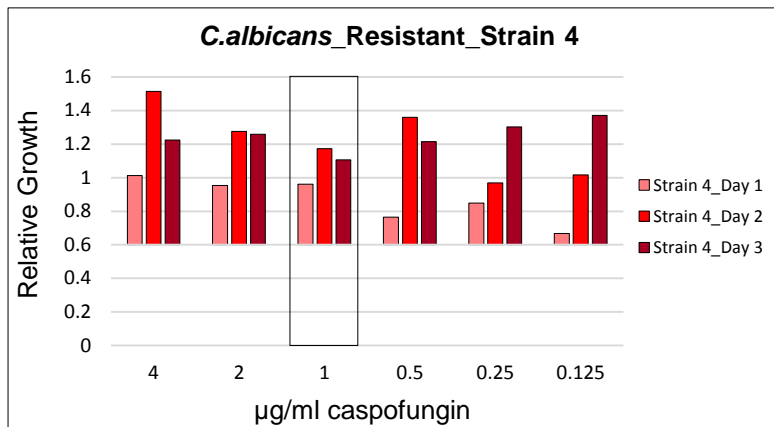

h.

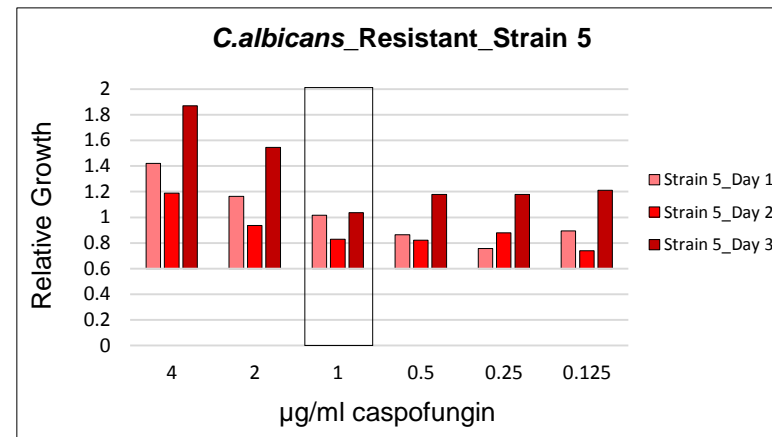

i.

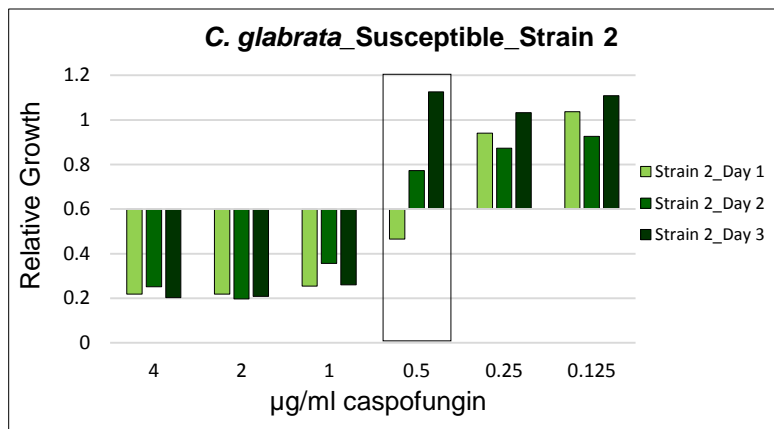

j.

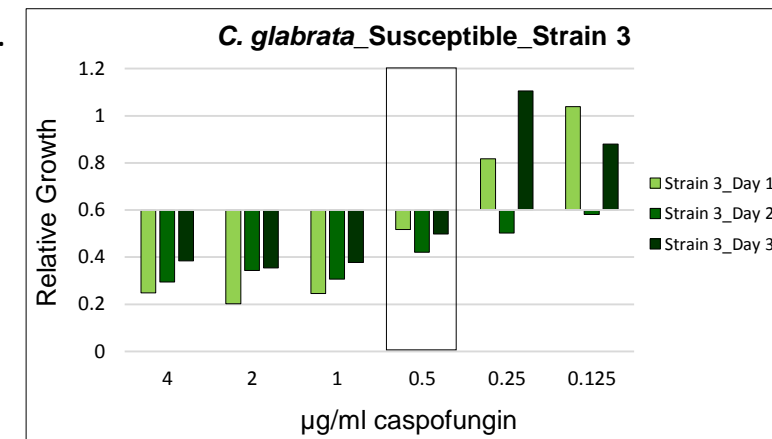

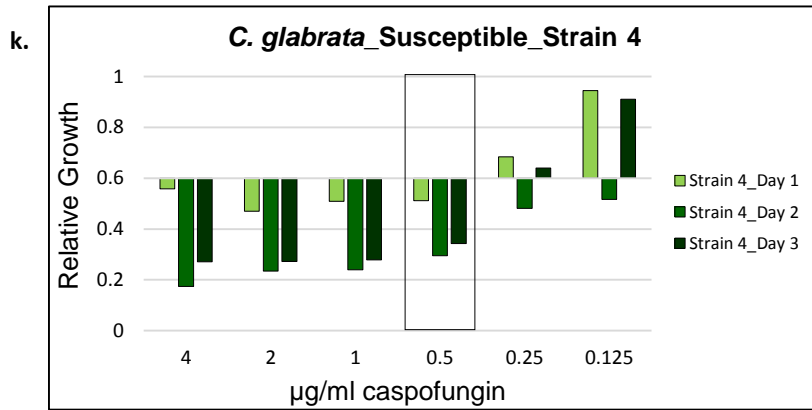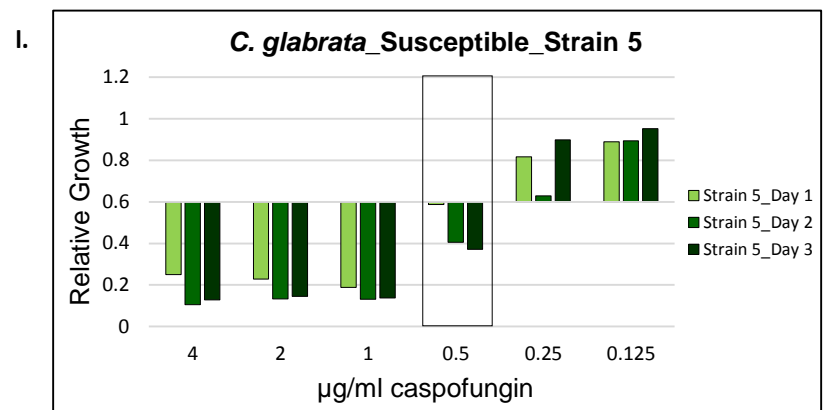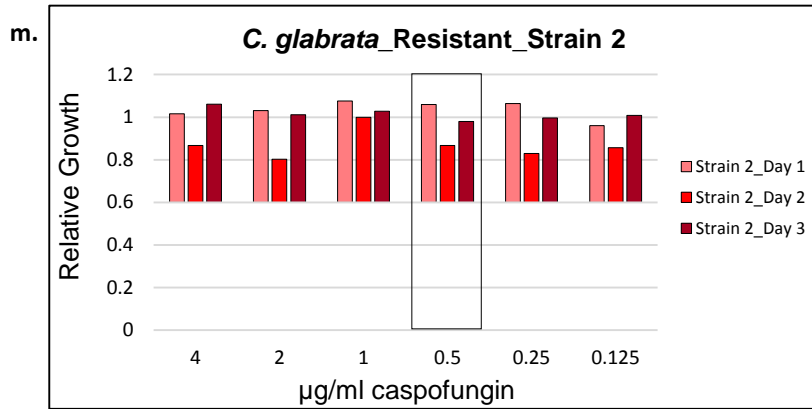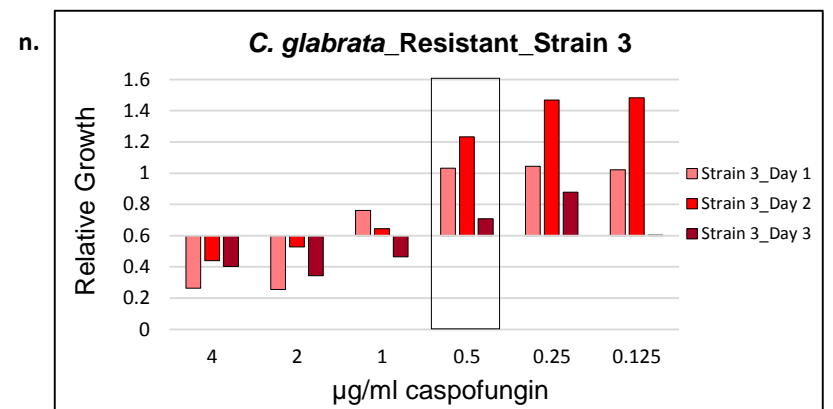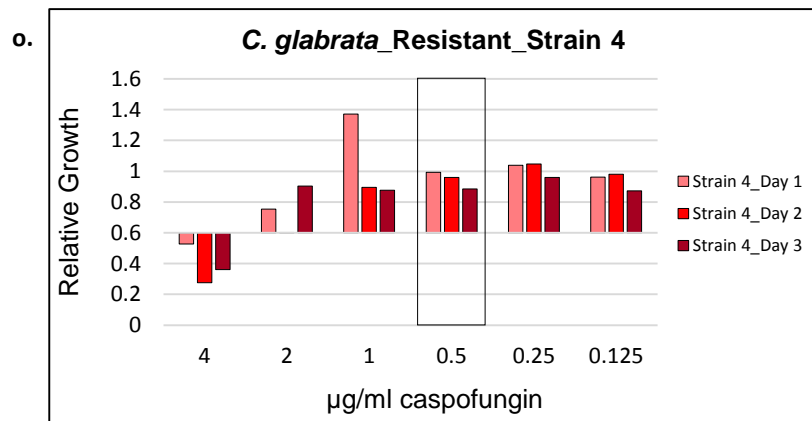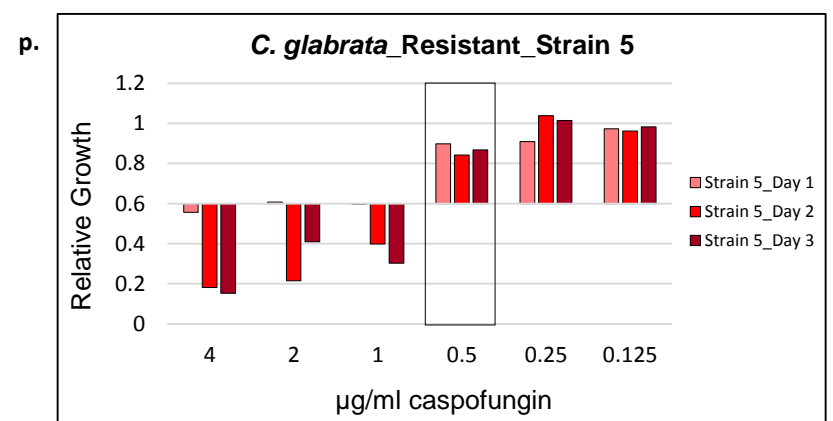

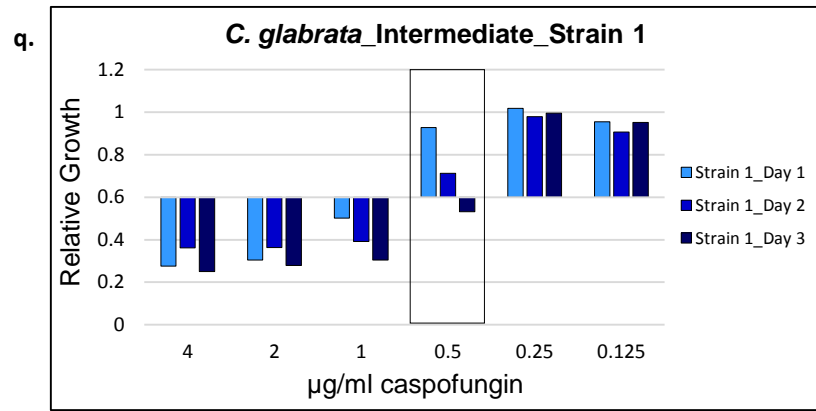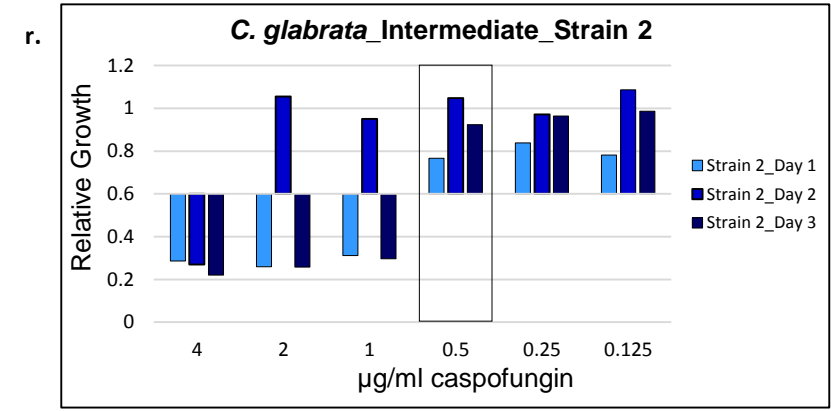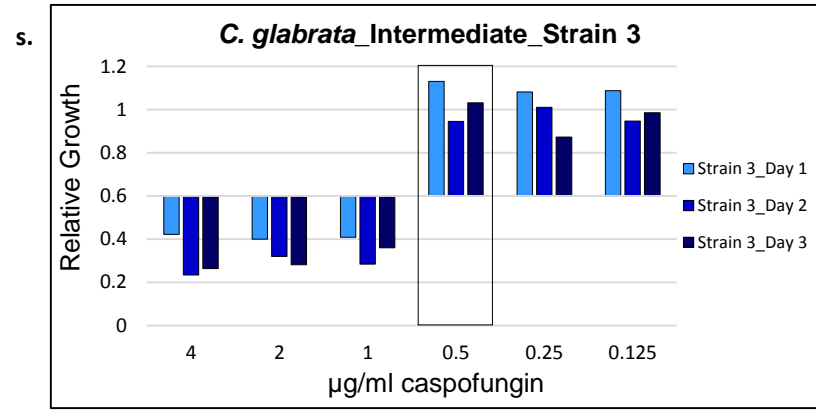

**Supplementary 1. Reproducibility of the MBT ASTRA.** Relative growth values were obtained by two-fold serial dilutions of caspofungin for *C. albicans* (susceptible (a-d), resistant (e-h)) and *C. glabrata* (susceptible (i-l), resistant (m-p), and intermediate (q-s)) on three different days. *C. albicans* and *C. glabrata* revealed constant results at the breakpoint concentration (boxes) for the different experiments.
